# Supplementary material for: Digital Behavior Change Interventions for the Prevention and Management of Type 2 Diabetes: Systematic Market Analysis
Source: PubMed Central journal article supplement (PMC8783286; doi:10.2196/33348), 2022-01-07
Supplement: jmir_v24i1e33348_app2.pdf [file jmir_v24i1e33348_app2.pdf]

### Aspect 1: Company characteristics

| Company name                           | Headquarter location                         | Year founded | Employees | Funding (million USD) |
|----------------------------------------|----------------------------------------------|--------------|-----------|-----------------------|
| Noom, Inc.                             | New York, NY                                 | 2008         | 1001-5000 | 657.3                 |
| Virta Health Corp.                     | San Francisco, CA                            | 2014         | 251-500   | 373.0                 |
| Omada Health, Inc.                     | San Francisco, CA                            | 2011         | 251-500   | 256.5                 |
| Livongo Health, Inc.                   | Mountain View, CA                            | 2008         | 251-500   | 235.0                 |
| Vida Health, Inc.                      | San Francisco, CA                            | 2014         | 501-1000  | 188.0                 |
| DarioHealth Corp.                      | New York, NY                                 | 2011         | 11-50     | 169.0                 |
| Informed Data Systems, Inc. (One Drop) | New York, NY                                 | 2014         | 1-10      | 106.2                 |
| Lark Technologies, Inc.                | Mountain View, CA                            | 2011         | 101-250   | 95.7                  |
| Welldoc, Inc.                          | Columbia, MD                                 | 2005         | 101-250   | 55.2                  |
| Liva Healthcare ApS                    | Copenhagen, Hovedstaden, Denmark             | 2014         | 11-50     | 43.5                  |
| Twin Health, Inc.                      | Mountain View, California, United States     | 2018         | 101-250   | 43.5                  |
| Oviva, Inc.                            | London, England, United Kingdom              | 2013         | 101-250   | 33.0                  |
| KKT Technology Pte. Ltd. (Holmusk)     | Singapore, Central Region, Singapore         | 2015         | 11-50     | 31.3                  |
| Sweetech Health Ltd.                   | Jerusalem, Yerushalayim, Israel              | 2013         | 1-10      | 27.5                  |
| Nemaura Medical Inc.                   | Loughborough, Leicestershire, United Kingdom | 2011         | 1-10      | 25.0                  |
| Fruit Street Health P.B.C.             | New York, NY                                 | 2014         | 101-250   | 15.5                  |

## Aspect 2: Scientific evidence

| DBCI         | Number of publications categorised by evidence level |         |         | Number of participants over all studies | Average journal impact factor | DPRP recognition status |
|--------------|------------------------------------------------------|---------|---------|-----------------------------------------|-------------------------------|-------------------------|
|              | Level 1                                              | Level 2 | Level 3 |                                         |                               |                         |
| Noom         | 1                                                    | 7       | 0       | 51367                                   | 3.7                           | Full                    |
| Virta        | 0                                                    | 7       | 0       | 1755                                    | 4.9                           | No                      |
| Omada        | 0                                                    | 11      | 0       | 17388                                   | 3.3                           | Full                    |
| Livongo      | 1                                                    | 3       | 0       | 5079                                    | 4.3                           | Full                    |
| Vida         | 0                                                    | 2       | 0       | 1695                                    | 3.5                           | Full                    |
| Dario        | 0                                                    | 0       | 0       | NA                                      | NA                            | No                      |
| One Drop     | 0                                                    | 2       | 0       | 1544                                    | 4.4                           | Pending                 |
| Lark         | 0                                                    | 1       | 0       | 70                                      | 4.5                           | Full                    |
| BlueStar     | 1                                                    | 5       | 0       | 607                                     | 6.1                           | Pending                 |
| Liva         | 1                                                    | 3       | 0       | 294                                     | 13.7                          | No                      |
| Twin         | 0                                                    | 1       | 0       | 64                                      | 3.2                           | No                      |
| Oviva        | 0                                                    | 2       | 0       | 212                                     | 4.3                           | No                      |
| GlycoLeap    | 0                                                    | 1       | 0       | 100                                     | 4.3                           | No                      |
| Sweetch      | 0                                                    | 1       | 0       | 55                                      | 4.9                           | No                      |
| BEATdiabetes | 0                                                    | 0       | 0       | NA                                      | NA                            | No                      |
| Fruit Street | 0                                                    | 0       | 0       | NA                                      | NA                            | Full                    |

Abbreviations: DBCI=Digital behaviour change intervention, DPRP=Diabetes Prevention Recognition Program by the US Centers for Disease Control and Prevention, NA=No studies available

### Aspect 3: Characteristics of DBCIs

| Name of app  | Name of the intervention Program        | App accessible | Tracked health and behavioural outcomes                                    | Self-Reports used                        | Sensor and Device Analytics used                         | Operating systems | Number of downloads (Google Play Store) | Cost                                                                 | Health continuum category | Conver-sational agent used? | Human health professionals involved | Additional devices as part of the intervention program                                                                                                      |
|--------------|-----------------------------------------|----------------|----------------------------------------------------------------------------|------------------------------------------|----------------------------------------------------------|-------------------|-----------------------------------------|----------------------------------------------------------------------|---------------------------|-----------------------------|-------------------------------------|-------------------------------------------------------------------------------------------------------------------------------------------------------------|
| Noom         | Noom program                            | Yes            | Physical activity, Body weight, Sleep, Diet, Blood pressure                | Open questions, Ratings, Multiple choice | Physical activity, Accelerometer gyroscope               | iOS, Android      | 10000000+                               | \$59.00 USD/month or \$199.00 USD/year                               | Prevention, Management    | No                          | Yes                                 | NA                                                                                                                                                          |
| Virta Health | Virta Program                           | No             | -                                                                          | -                                        | -                                                        | iOS, Android      | 1000+                                   | Unclear                                                              | Management                | -                           | Yes                                 | Starter kit with wireless body weight scale, blood glucose and ketone meter and testing strips, lancets, protein food scale, blood pressure cuff (optional) |
| Omada        | Omada Health Program                    | Yes            | Blood glucose, Physical activity, Body weight, Diet, Blood pressure        | Open questions, Ratings, Multiple choice | Body sensors, Physical activity, Bluetooth               | iOS, Android      | 100000+                                 | \$140/month for the first 4 months, \$20/month for following months. | Prevention, Management    | No                          | Yes                                 | Wireless scale, pedometer, tape for measurement (waist), resistance band                                                                                    |
| Livongo      | Livongo for Diabetes Program            | Yes            | HbA1c, Blood Glucose, Physical activity, Body weight, Diet, Blood pressure | Open questions, Ratings                  | Body sensors, Camera, Bluetooth, Accelerometer gyroscope | iOS, Android      | 100000+                                 | Purchase free, costs covered by employer or healthcare provider      | Prevention, Management    | No                          | Yes, but optional                   | Livongo blood glucose meter and all necessary materials (lancet, test stripes) and transport case.                                                          |
| Vida Health  | Vida Health Diabetes Prevention Program | Yes            | HbA1c, Physical activity, Body weight, Stress, Diet,                       | Open questions, Ratings, Multiple choice | Bluetooth                                                | iOS, Android      | 10000+                                  | Free download, free 1 week trial, subscription \$58.25-\$79/month    | Prevention, Management    | No                          | Yes                                 | NA                                                                                                                                                          |

| Name of app                   | Name of the intervention Program | App accessible | Tracked health and behavioural outcomes                                                         | Self-Reports used                        | Sensor and Device Analytics used                           | Operating systems | Number of downloads (Google Play Store) | Cost                                                                                                   | Health continuum category | Conver-sational agent used? | Human health professionals involved | Additional devices as part of the intervention program                                               |
|-------------------------------|----------------------------------|----------------|-------------------------------------------------------------------------------------------------|------------------------------------------|------------------------------------------------------------|-------------------|-----------------------------------------|--------------------------------------------------------------------------------------------------------|---------------------------|-----------------------------|-------------------------------------|------------------------------------------------------------------------------------------------------|
| Dario Health                  | Unclear                          | No             | -                                                                                               | -                                        | -                                                          | iOS, Android      | 100000+                                 | Basic \$25-\$30/month, pro \$33-\$40/month, premium \$70-\$85/ month                                   | Management                | -                           | Yes, but optional                   | Dario Health all-in-one device (with lancing device, blood glucose meter and placeholder for strips) |
| One Drop: Transform Your Life | One Drop Program                 | Yes            | HbA1c, Blood glucose, Physical activity, Body weight, Medication tracking, Diet, Blood pressure | Open questions, Ratings, Multiple choice | Location, Camera, Telephone                                | iOS, Android      | 1000000+                                | Digital membership \$19.99/month, supplies \$20.99/month, combined package \$30.99/month               | Management                | No                          | Yes                                 | One Drop blood glucose meter (optional; for 20\$/month with unlimited testing strips)                |
| Lark                          | Lark Diabetes Prevention Program | Yes            | Physical activity, Body weight, Sleep, Mood, Wellbeing, Diet                                    | Open questions, Ratings, Multiple Choice | Bluetooth, Accelerometer gyroscope, GPS, Application usage | iOS, Android      | 100000+                                 | Lark Weight Loss Pro \$19.99, Lark Wellness Pro \$14.99, Lark Diabetes Prevention Program Pro \$119.99 | Prevention, Management    | Yes                         | No                                  | Preventive insurance benefit for prediabetes covers a Lark blood sugar meter, Lark scale, Fitbit     |
| BlueStar Diabetes             | Unclear                          | No             | -                                                                                               | -                                        | -                                                          | iOS, Android      | 10000+                                  | Unclear                                                                                                | Prevention, Management    | -                           | Yes                                 | Unclear                                                                                              |
| Liva UK                       | Unclear                          | No             | -                                                                                               | -                                        | -                                                          | iOS, Android      | 10000+                                  | Unclear                                                                                                | Prevention, Management    | -                           | Yes                                 | NA                                                                                                   |

| Name of app                   | Name of the intervention Program                           | App accessible | Tracked health and behavioural outcomes                                                              | Self-Reports used                        | Sensor and Device Analytics used     | Operating systems | Number of downloads (Google Play Store) | Cost                                                                                                                                                | Health continuum category | Conver-sational agent used? | Human health professionals involved | Additional devices as part of the intervention program                        |
|-------------------------------|------------------------------------------------------------|----------------|------------------------------------------------------------------------------------------------------|------------------------------------------|--------------------------------------|-------------------|-----------------------------------------|-----------------------------------------------------------------------------------------------------------------------------------------------------|---------------------------|-----------------------------|-------------------------------------|-------------------------------------------------------------------------------|
| Twin Health                   | Twin Precision Nutrition Program                           | No             | -                                                                                                    | -                                        | -                                    | iOS, Android      | 5000+                                   | 1450 Rs (ca. 19.80 USD) for a 14 days trial, price for continuous use unclear                                                                       | Management                | -                           | Unclear                             | Abbott Freestyle Libre Pro GCM sensor                                         |
| Oviva                         | Oviva Program                                              | Yes            | Blood glucose, Physical activity, Body weight, Mood, Diet                                            | Open questions, Ratings, Multiple choice | Camera                               | iOS, Android      | 10000+                                  | CHF 484 carried by healthcare provider                                                                                                              | Prevention, Management    | No                          | Yes                                 | NA                                                                            |
| GlycoLeap - Your Health Coach | GlycoLeap                                                  | Yes            | HbA1c, Blood glucose, Body weight, Mood, Diet                                                        | Open questions, Ratings                  | Camera, Bluetooth, Photos            | iOS, Android      | 1000+                                   | Free, but only available for diabetic and prediabetic patients through their doctor if they are part of the project or through particular employers | Prevention, Management    | No                          | Yes                                 | Glucometer, refills of test strips, fitness tracker, connected weighing scale |
| Sweetch Health                | Unclear                                                    | No             | -                                                                                                    | -                                        | -                                    | iOS, Android      | 500+                                    | Unclear                                                                                                                                             | Prevention, Management    | -                           | No                                  | Unclear                                                                       |
| BEATdiabetes                  | BEATdiabetes                                               | Yes            | HbA1c, Blood Glucose, Physical activity, Body weight, Medication tracking, Waist circumference, Diet | Open questions, Ratings, Multiple choice | Bluetooth                            | iOS, Android      | 5+                                      | Unclear                                                                                                                                             | Prevention, Management    | No                          | Yes                                 | Unclear                                                                       |
| Fruit Street                  | Fruit Street's Diabetes Prevention and Weight Loss Program | Yes            | Blood glucose, Physical activity, Body weight, Sleep, Heart rate, Calories, Diet, Blood pressure     | Open questions, Ratings                  | Physical activity, Camera, Bluetooth | iOS, Android      | 1000+                                   | \$19.99/month                                                                                                                                       | Prevention                | No                          | Yes                                 | Wireless scale & Fitbit activity tracker                                      |

Abbreviations: -=App not accessible, DBCI=Digital behaviour change intervention, NA=No additional devices included
