# Supplementary material for: Digital Behavior Change Interventions for the Prevention and Management of Type 2 Diabetes: Systematic Market Analysis
Source: PubMed Central journal article supplement (PMC8783286; doi:10.2196/33348), 2022-01-07
Supplement: jmir_v24i1e33348_app3.pdf [file jmir_v24i1e33348_app3.pdf]

| DBCI | Study authors name                                                                                                                    | Study title                                                                                                                                                   | Year of publication | Journal impact factor | Design          | Number of participants | Outcomes measured                                                                 | Comparison to other treatment         | Findings of RCTs                                                                                                                                                                                                                                                                                                                                                                                                                                                                                                                                                                                |
|------|---------------------------------------------------------------------------------------------------------------------------------------|---------------------------------------------------------------------------------------------------------------------------------------------------------------|---------------------|-----------------------|-----------------|------------------------|-----------------------------------------------------------------------------------|---------------------------------------|-------------------------------------------------------------------------------------------------------------------------------------------------------------------------------------------------------------------------------------------------------------------------------------------------------------------------------------------------------------------------------------------------------------------------------------------------------------------------------------------------------------------------------------------------------------------------------------------------|
| Noom | Ku, E.J.; Park, J.; Jeon, H.J.; Oh T.; Choi, H.J.                                                                                     | Clinical Efficacy and Plausibility of a Smartphone-based Integrated Online Real-time Diabetes Care System via Glucose and Diet Data Management: A Pilot Study | 2020                | 1.767                 | RCT             | 40                     | HbA1c*; Self-care                                                                 | Yes, compared to conventional care    | #not adequately powered                                                                                                                                                                                                                                                                                                                                                                                                                                                                                                                                                                         |
| Noom | Kim, Y.; Oh, B.; Shin, H.                                                                                                             | Effect of mHealth With Offline Antiobesity Treatment in a Community-Based Weight Management Program: Cross-Sectional Study                                    | 2020                | 4.301                 | NCT             | 150                    | Weight; BMI; Waist circumference; Fat mass; Metabolic equivalent                  | No, no comparison to other treatment  | -                                                                                                                                                                                                                                                                                                                                                                                                                                                                                                                                                                                               |
| Noom | Toro-Ramos, T; Lee D; Kim, Y.; Michaelides, A.; Oh, T.J.; Kim, K.M; Jang H.C.; Lim, S.;                                               | Effectiveness of a Smartphone Application for the Management of Metabolic Syndrome Components Focusing on Weight Loss: A Preliminary Study                    | 2017                | 1.597                 | Matched control | 104                    | Weight; BP; Waist circumference; Glucose profile; Lipid profile; Body composition | No, no comparison to other treatment  | -                                                                                                                                                                                                                                                                                                                                                                                                                                                                                                                                                                                               |
| Noom | Toro-Ramos, T.; Michaelides, A.; Anton, M.; Karim, Z.; Kang-Oh, L.; Argyrou, C.; Loukaidou, E.; Charitou, M.M.; Sze, W.; Miller, J.D. | Mobile Delivery of the Diabetes Prevention Program in People With Prediabetes: Randomized Controlled Trial                                                    | 2020                | 4.301                 | RCT             | 202                    | HbA1c*; Weight*; BMI                                                              | Yes, compared to regular medical care | No difference in HbA1c levels between groups at 6 months (mean difference 0.004%, SE 0.05; P=.94) or 12 months (0.006%; SE 0.07; P=.93). At one year, the intervention group showed a 0.23% reduction in HbA1c levels while the control group had a 0.16% reduction in HbA1c. Weight and BMI in the intervention group were significantly lower at 6 months (mean difference - 2.64kg, SE 0.71, P<0.001 and -0.99 kg/m <sup>2</sup> , SE 0.29, P<0.001, respectively) and at 12 months (mean difference - 1.80kg, SE 0.81, P=0.01 and - 0.58kg/m <sup>2</sup> , SE 0.24, P=0.01, respectively). |
| Noom | DeLuca, L; Toro-Ramos, T.; Michaelides, A.; Seng, E.; Swencionis, C.                                                                  | Relationship Between Age and Weight Loss in Noom: Quasi-Experimental Study                                                                                    | 2020                | 4.532                 | NCT             | 14767                  | Weight                                                                            | No, no comparison to other treatment  | -                                                                                                                                                                                                                                                                                                                                                                                                                                                                                                                                                                                               |

|         |                                                                                                                              |                                                                                                                                                    |      |       |                           |       |                                                                      |                                      |                                                                                                                                                                  |
|---------|------------------------------------------------------------------------------------------------------------------------------|----------------------------------------------------------------------------------------------------------------------------------------------------|------|-------|---------------------------|-------|----------------------------------------------------------------------|--------------------------------------|------------------------------------------------------------------------------------------------------------------------------------------------------------------|
| Noom    | Chin, S.O.; Keum, C.; Woo, J.; Park, J.; Choi, H.J.; Woo, J.; Rhee, S.Y.                                                     | Successful weight reduction and maintenance by using a smartphone application in those with overweight and obesity                                 | 2016 | 4.011 | NCT                       | 35921 | Weight                                                               | No, no comparison to other treatment | -                                                                                                                                                                |
| Noom    | Michaelides, A.; Major, J.; Pienkosz, E.; Wood, M.; Kim, Y.; Toro-Ramos, T.                                                  | Usefulness of a Novel Mobile Diabetes Prevention Program Delivery Platform With Human Coaching: 65-Week Observational Follow-Up                    | 2018 | 4.301 | NCT                       | 140   | Weight                                                               | No, no comparison to other treatment | -                                                                                                                                                                |
| Noom    | Michaelides, A.; Raby, C.; Wood, M.; Farr, K.; Toro-Ramos, T.                                                                | Weight loss efficacy of a novel mobile Diabetes Prevention Program delivery platform with human coaching                                           | 2016 | 5.067 | NCT                       | 43    | Weight                                                               | No, no comparison to other treatment | -                                                                                                                                                                |
| Sweetch | Everett, E.; Kane, B.; Yoo, A.; Dobs, A.; Mathioudakis, N.                                                                   | A Novel Approach for Fully Automated, Personalized HealthCoaching for Adults with Prediabetes Pilot Clinical Trial                                 | 2018 | 4.945 | NCT                       | 55    | Physical activity; Weight; BMI; HbA1c                                | No, no comparison to other treatment | -                                                                                                                                                                |
| Welldoc | Quinn, C.C.; Shardell, M.D.; Terrin, M.L.; Barr, E.A.; Ballew, S.H.; Gruber-Baldini, A.L.                                    | Cluster-Randomized Trial of a Mobile Phone Personalized Behavioral Intervention for Blood Glucose Control                                          | 2011 | 15.27 | RCT                       | 163   | HbA1c*; Diabetes Symptoms; Diabetes Distress; Depression; BP; Lipids | Yes, compared to usual care          | Mean HbA1c declined by 1.9% in the the maximal treatment group and 0.7% in the usual care group, which results in a difference of 1.2% (P<0.001) over 12 months. |
| Welldoc | Quinn, C.C.; Clough, S.S.; Minor, J.M.; Lender, D.; Okafor, M.C.; Gruber-Baldini, A.                                         | WellDoc™ Mobile Diabetes Management Randomized Controlled Trial: Change in Clinical and Behavioral Outcomes and Patient and Physician Satisfaction | 2008 | 4.48  | RCT                       | 30    | HbA1c*; Medication use; Depression; Diet; Self-care; Control issues  | No, no comparison to other treatment | #not adequately powered                                                                                                                                          |
| Welldoc | Quinn, C.C.; Shardell, M.D.; Terrin, M.L.; Barr, E.A.; Park, D.; Shaikh, F.; Guralnik, J.; Gruber-Baldini, A.L.              | Mobile Diabetes Intervention for Glycemic Control in 45-to 64-Year-Old Persons With Type 2 Diabetes                                                | 2016 | 1.638 | Secondary analysis of RCT | 118   | HbA1c                                                                | Yes, compared to usual care          | -                                                                                                                                                                |
| Welldoc | Quinn, C.C.; Sareh, P.L.; Shardell, M.L.; Terrin, M.L.; Barr, E.A.; Gruber-Baldini, A.L.                                     | Mobile Diabetes Intervention for Glycemic Control: Impact on Physician Prescribing                                                                 | 2014 | NA    | Secondary analysis of RCT | 117   | Medication use                                                       | Yes, compared to usual care          | -                                                                                                                                                                |
| Welldoc | Desveaux, L.; Shaw, J.; Saragosa, M.; Soobiah, C.; Marani, H.; Hansel, J.; Agarwal, P.; Onabajo, N.; Bhatia, R.S.; Jeffs, L. | A Mobile App to Improve Self-Management of Individuals With Type 2 Diabetes: Qualitative Realist Evaluation                                        | 2018 | 5.03  | NCT                       | 16    | HbA1c                                                                | No, no comparison to other treatment | -                                                                                                                                                                |

|              |                                                                                                                                                                                   |                                                                                                                                                                                                                     |      |       |                           |     |                                                                                                                                             |                                      |   |
|--------------|-----------------------------------------------------------------------------------------------------------------------------------------------------------------------------------|---------------------------------------------------------------------------------------------------------------------------------------------------------------------------------------------------------------------|------|-------|---------------------------|-----|---------------------------------------------------------------------------------------------------------------------------------------------|--------------------------------------|---|
| WellDoc      | Quinn, C.C.; Swasey, K.K.;<br>Crabbe, C.F.; Shardell, M.D.;<br>Terrin, M.L.; Barr, E.A.;<br>Gruber-Baldini, A.L.                                                                  | The Impact of a Mobile Diabetes Health Intervention on Diabetes Distress and Depression Among Adults: Secondary Analysis of a Cluster Randomized Controlled Trial                                                   | 2017 | 4.313 | Secondary analysis of RCT | 163 | Diabetes Distress; Depression                                                                                                               | Yes, compared to usual care          | - |
| Virta Health | Hallberg, S.J.; McKenzie, A.L.;<br>Williams, P.T.; Bhanpuri, N.H.;<br>Peters, A.L.; Campell, W.W.;<br>Hazburn, T.L.; Volk, B.M.;<br>McCarter, J.P.; Phinney, S.D.;<br>Volek, J.S. | Effectiveness and Safety of a Novel Care Model for the Management of Type 2 Diabetes at 1YearAn Open-Label, Non-Randomized, Controlled Study                                                                        | 2018 | 2.827 | CT                        | 349 | HbA1c; Weight; Medication use; Blood glucose; HOMA-IR; Blood Lipids and lipoproteins; Liver and kidney function markers; C-reactive protein | Yes, compared to usual care          | - |
| Virta Health | McKenzie, A.L.; Hallberg, S.J.;<br>Creighton, B.C.; Volk, B.M.;<br>Link, T.M.; Abner, M.K.; Glon, R.M.;<br>McCartner, J.P.; Volek, J.S.;<br>Phinney, S.D.                         | A Novel Intervention Including Individualized Nutritional Recommendations Reduces Hemoglobin A1c Level, Medication Use, and Weight in Type 2 Diabetes                                                               | 2017 | 4.534 | NCT                       | 262 | HbA1c; Weight; Medication use; BP; Cholesterol; Triglycerides; C-reactive protein; White blood cell count; Kidney and liver functions       | No, no comparison to other treatment | - |
| Virta Health | Bhanpuri, N.H.; Hallberg, S.J.;<br>Williams, P.T.; McKenzie, A.L.;<br>Ballard, K.D.; Campell, W.W.;<br>McCarter, J.P.; Phinney, S.D.;<br>Volek, J.S.;                             | Cardiovascular disease risk factor responses to a type 2 diabetes care model including nutritional ketosis induced by sustained carbohydrate restriction at 1 year: an open label, non-randomized, controlled study | 2018 | 8.285 | CT                        | 262 | Biomarkers of cholesterol metabolism and inflammation; BP; Carotid intima media thickness; Multi-factorial risk scores; Medication use      | Yes, compared to usual care          | - |
| Virta Health | Siegmann, M.J.;<br>Athinarayanan, S.J.;<br>Hallberg, S.J.; McKenzie, A.L.;<br>Bhanpuri, N.H.; Campbell, W.W.;<br>McCarter, J.P.; Phinney, S.D.;<br>Volek, J.S.;<br>Van Dort, C.J  | Improvement in patient-reported sleep in type 2 diabetes and prediabetes participants receiving a continuous care intervention withnutritional ketosis                                                              | 2018 | 3.36  | CT                        | 262 | Sleep quality                                                                                                                               | Yes, compared to usual care          | - |

|              |                                                                                                                                           |                                                                                                                                                                              |      |       |     |     |                                                                                                                                                                               |                                                                         |   |
|--------------|-------------------------------------------------------------------------------------------------------------------------------------------|------------------------------------------------------------------------------------------------------------------------------------------------------------------------------|------|-------|-----|-----|-------------------------------------------------------------------------------------------------------------------------------------------------------------------------------|-------------------------------------------------------------------------|---|
| Virta Health | Athinarayanan,S.J.; Adams, R.N.; Hallberg, S.J.; McKenzie, A.L.; Bhanpuri, N.H.; Campbell, W.W.; Volek, J.S.; Phinney, S.D; McCarter, J.P | Long-Term Effects of a Novel Continuous Remote Care Intervention Including Nutritional Ketosis for the Management of Type 2 Diabetes: A 2-Year Non-randomized Clinical Trial | 2019 | 3.634 | CT  | 262 | HbA1c; HOMA-IR; Blood glucose; Fasting insulin; C-Peptide; Weight; Body composition; Liver, cardiovascular, thyroid, and inflammatory markers; Medication use; Disease status | Yes, compared to usual care                                             | - |
| Virta Health | Athinarayanan, S.J.; Hallberg, S.J.; McKenzie, A.L.; Lechner, K.; King, S.; McCarter, J.P.; Volek, J.S.; Phinney, S.D.; Krauss, R.M.      | Impact of a 2-year trial of nutritional ketosis on indices of cardiovascular disease risk in patients with type 2 diabetes                                                   | 2020 | 7.332 | CT  | 262 | Risk markers of atherosclerotic cardiovascular disease                                                                                                                        | Yes, compared to usual care                                             | - |
| Virta Health | McKenzie, A.L.; Athinarayanan,S.J.; McCue, J.J.; Adams, R.N.; Keyes, M.; McCarter, J.P.; Volek, J.S.; Phinney, S.D.; Hallberg, S.J.       | Type 2 Diabetes Prevention Focused on Normalization of Glycemia: A Two-Year Pilot Study                                                                                      | 2021 | 4.546 | NCT | 96  | Change in metabolic status                                                                                                                                                    | No, no comparison to other treatment                                    | - |
| Oviva        | Haas, K.; Hayot, S.; Maurer-Wiesner, S.                                                                                                   | Effectiveness and Feasibility of a Remote Lifestyle Intervention by Dietitians for Overweight and Obese Adults: Pilot Study                                                  | 2019 | 4.31  | NCT | 43  | Weight; HbA1c; Blood glucose; Fasting insulin, triglyceride, HDL cholesterol; BP; BMI; waist circumference; Body fat; Physical activity; Diet; Quality of life                | No, no comparison to other treatment                                    | - |
| Oviva        | Huntriss, R.; Haines, M.; Jones, L.; Mulligan, D.                                                                                         | A service evaluation exploring the effectiveness of a locally commissioned tier 3 weight management programme offering face-to-face, telephone and digital dietetic support  | 2021 | NA    | NCT | 169 | Weight; BMI; Number of psychology support sessions                                                                                                                            | Yes, compared to face-to-face support and telephone support             | - |
| Livongo      | Bollyky, J.B.; Bravata, D.; Yang, J.; Williamson, M.; Schneider, J.                                                                       | Remote Lifestyle Coaching Plus a Connected Glucose Meter with Certified Diabetes Educator Support Improves Glucose and Weight Loss for People with Type 2 Diabetes           | 2018 | 3.04  | CT  | 330 | Blood glucose; HbA1c; Weight                                                                                                                                                  | Yes, compared to light coaching and to receiving only a connected scale | - |

|             |                                                                                                                   |                                                                                                                                                                             |      |       |     |      |                                  |                                      |                                                                                                                                                                                                                                                                                                                                                                                                                                                                                                        |
|-------------|-------------------------------------------------------------------------------------------------------------------|-----------------------------------------------------------------------------------------------------------------------------------------------------------------------------|------|-------|-----|------|----------------------------------|--------------------------------------|--------------------------------------------------------------------------------------------------------------------------------------------------------------------------------------------------------------------------------------------------------------------------------------------------------------------------------------------------------------------------------------------------------------------------------------------------------------------------------------------------------|
| Livongo     | Bollyky, J.B.; Melton, S.T.; Xu, T.; Painter, S.L.; Knox, B.                                                      | The Effect of a Cellular-Enabled Glucose Meter on Glucose Control for Patients With Diabetes: Prospective Pre-Post Study                                                    | 2019 | 4.532 | NCT | 86   | HbA1c; Blood glucose; Depression | No, no comparison to other treatment | -                                                                                                                                                                                                                                                                                                                                                                                                                                                                                                      |
| Livongo     | Downing, J.; Bollyky, J.; Schneider, J.                                                                           | Use of a Connected Glucose Meter and Certified Diabetes Educator Coaching to Decrease the Likelihood of Abnormal Blood Glucose Excursions: The Livongo for Diabetes Program | 2017 | 4.945 | NCT | 4544 | Blood glucose                    | No, no comparison to other treatment | -                                                                                                                                                                                                                                                                                                                                                                                                                                                                                                      |
| Livongo     | Amante, D.J.; Harlan, D.M.; Lemon, S.C.; McManus, D.D.; Olaitan, O.O.; Pagoto, S.L.; Gerber, B.S.; Thompson, M.J. | Evaluation of a Diabetes Remote Monitoring Program Facilitated by Connected Glucose Meters for Patients With Poorly Controlled Type 2 Diabetes: Randomized Crossover Trial  | 2021 | 4.532 | RCT | 119  | HbA1c*                           | Yes, comparison to usual care        | - Improvements in mean HbA1c seen in both groups during the first 6 months (Intervention (IV)/Usual Care (US) -1.1% , SD 1.5 vs UC/IV - 0.8%, SD 1.5; P<.001). After cross-over, no change in HbA1c of IV/UC (mean HbA1c change +0.2, SD 1.7, P=.41), but further improvement in UC/IV (mean HbA1c change - 0.4%, SD 1.0, P=.008).<br>- Mixed-effects model revealed a nonsignificant difference in HbA1c improvement of 0.37% between the intervention and usual care treatment groups over 12 months |
| Liva Health | Komkova, A.; Brandt, C.J.; Pedersen, D.H.; Emneus, M.; Sortsø, C.                                                 | Electronic Health Lifestyle Coaching Among Diabetes Patients in a Real-Life Municipality Setting: Observational Study                                                       | 2019 | 4.532 | NCT | 103  | Weight                           | No, no comparison to other treatment | -                                                                                                                                                                                                                                                                                                                                                                                                                                                                                                      |
| Liva Health | Brandt, V.; Brandt, C.J.; Glingtborg, D.; Arendal, C.; Tourbo, S.; Brandt, K.                                     | Sustained Weight Loss during 20 Months using a Personalized Interactive Internet Based Dietician Advice Program in a General Practice Setting                               | 2011 | 0.14  | NCT | 32   | Weight                           | No, no comparison to other treatment | -                                                                                                                                                                                                                                                                                                                                                                                                                                                                                                      |
| Liva Health | Haste, A.; Adamson, A.J.; McColl, E.; Araujo-Soares, V.; Bell, R.                                                 | Web-Based Weight Loss Intervention for Men With Type 2 Diabetes: Pilot Randomized Controlled Trial                                                                          | 2017 | 4.532 | RCT | 61   | Weight; BMI; Waist circumference | No, no comparison to other treatment | #not adequately powered                                                                                                                                                                                                                                                                                                                                                                                                                                                                                |

|             |                                                                                                                                                                                                                                  |                                                                                                                                                      |      |       |                      |      |                                                                                                 |                                                                                                            |                                                                                                                                                                                                                                                                                                                                                |
|-------------|----------------------------------------------------------------------------------------------------------------------------------------------------------------------------------------------------------------------------------|------------------------------------------------------------------------------------------------------------------------------------------------------|------|-------|----------------------|------|-------------------------------------------------------------------------------------------------|------------------------------------------------------------------------------------------------------------|------------------------------------------------------------------------------------------------------------------------------------------------------------------------------------------------------------------------------------------------------------------------------------------------------------------------------------------------|
| Liva Health | Johansen, M.Y.; MacDonald, C.S.; Hansen, K.B.; Karstoft, K.; Christensen, R.; Pedersen, M.; Hansen, L.S.; Zacho, M.; Wedell-Neergaard A.; Nielsen, S.T.; Iepsen, U.W.; Langberg, H.; Vaag, A.A.; Pedersen, B.K.; Ried-Larsen, M. | Effect of an Intensive Lifestyle Intervention on Glycemic Control in Patients With Type 2 Diabetes<br>A Randomized Clinical Trial                    | 2017 | 45.54 | RCT                  | 98   | HbA1c*; Medication use; Lipids, BP; Body composition, Physical fitness, Physical activity, Diet | No, no comparison to other treatment                                                                       | Over 12 months, the mean HbA1c level decreased by 0.31% in the lifestyle group, compared 0.04% in the standard care group. The between-group difference did not meet the predefined equivalence of $\pm 0.4\%$ for a clinically relevant reduction in HbA1c level (mean between-group difference of -0.26% [95% CI, -0.52% to -0.01], P=0.15). |
| Lark        | Stein, N.; Brooks, K.                                                                                                                                                                                                            | A Fully Automated Conversational Artificial Intelligence for Weight Loss: Longitudinal Observational Study Among Overweight and Obese Adults         | 2017 | 4.532 | NCT                  | 70   | Weight; Meal quality                                                                            | No, no comparison to other treatment                                                                       | -                                                                                                                                                                                                                                                                                                                                              |
| Holmusk     | Koot, D.; Goh, P.S.C.; Lim, R.S.M.; Tian, Y.; Yau, T.Y.; Tan, N.C.; Finkelstein, E.A.                                                                                                                                            | A Mobile Lifestyle Management Program (GlycoLeap) for People With Type 2 Diabetes: Single-Arm Feasibility Study                                      | 2019 | 4.313 | NCT                  | 100  | HbA1c; Weight                                                                                   | No, no comparison to other treatment                                                                       | -                                                                                                                                                                                                                                                                                                                                              |
| Vida Health | Mao, A.Y.; Chen, C.; Magana, C.; Barajas, K.C.; Olayiwola, N.                                                                                                                                                                    | A Mobile Phone-Based Health Coaching Intervention for Weight Loss and Blood Pressure Reduction in a National Payer Population: A Retrospective Study | 2017 | 4.301 | Matched pair-control | 1012 | Weight; BP                                                                                      | No, compared to standard pregnancy dietary orientation related to gestational weight gain but not diabetes | -                                                                                                                                                                                                                                                                                                                                              |
| Vida Health | Silberman, J.M.; Kaur, M.; Sletteland, J.; Venkatesan, A.                                                                                                                                                                        | Outcomes in a digital weight management intervention with one-on-one health coaching                                                                 | 2019 | 2.776 | NCT                  | 683  | Weight                                                                                          | No, no comparison to other treatment                                                                       | -                                                                                                                                                                                                                                                                                                                                              |
| One Drop    | Osborn, C.Y.; Van Ginkel, J.R.; Marrero, D.G.; Rodbard, D.; Huddlestone, B.; Dachis, J.                                                                                                                                          | One Drop Mobile on iPhone and Apple Watch An Evaluation of HbA1c Improvement Associated With Tracking Self-Care                                      | 2017 | 4.301 | NCT                  | 256  | HbA1c                                                                                           | No, no comparison to other treatment                                                                       | -                                                                                                                                                                                                                                                                                                                                              |
| One Drop    | Osborn, C.Y.; Van Ginkel, J.R.; Rodbard, D.; Heyman, M.; Marrero, D.; Huddlestone, B.; Dachis, J.                                                                                                                                | One Drop   Mobile: An Evaluation of Hemoglobin A1c Improvement Linked to App Engagement                                                              | 2017 | 4.532 | NCT                  | 1288 | HbA1c                                                                                           | No, no comparison to other treatment                                                                       | -                                                                                                                                                                                                                                                                                                                                              |

|              |                                                                                                                                                                                                                                          |                                                                                                                                                                                 |      |       |                 |      |                                                                                |                                                                                                                         |   |
|--------------|------------------------------------------------------------------------------------------------------------------------------------------------------------------------------------------------------------------------------------------|---------------------------------------------------------------------------------------------------------------------------------------------------------------------------------|------|-------|-----------------|------|--------------------------------------------------------------------------------|-------------------------------------------------------------------------------------------------------------------------|---|
| Twin Health  | Shamanna, P.; Saboo, B.; Damodharan, S.; Mohammed, J.; Mohamed, M.; Poon, T.; Kleinman, N.; Thajudeen, M.                                                                                                                                | Reducing HbA1c in Type 2 Diabetes Using Digital Twin Technology-Enabled Precision Nutrition: A Retrospective Analysis                                                           | 2020 | 3.179 | NCT             | 64   | HbA1c; Blood glucose; HOMA-IR; C-Peptide; Sleep, Physical activity; Heart rate | No, no comparison to other treatment                                                                                    | - |
| Omada Health | Chen, F.; Su, W.; Becker, S.H.; Payne, M.; Sweet, C.M.C.; Peters, A.L.; Dall, T.M.                                                                                                                                                       | Clinical and Economic Impact of a Digital, Remotely-Delivered Intensive Behavioral Counseling Program on Medicare Beneficiaries at Risk for Diabetes and Cardiovascular Disease | 2016 | 2.776 | NCT             | 1121 | Weight                                                                         | No, no comparison to other treatment                                                                                    | - |
| Omada Health | Sepah, S.C.; Jiang, L.; Ellis, R.J.; McDermott, K.; Peters, A.L.                                                                                                                                                                         | Engagement and outcomes in a digital Diabetes Prevention Program: 3-year update                                                                                                 | 2017 | 3.183 | NCT             | 220  | Weight; HbA1c                                                                  | No, no comparison to other treatment                                                                                    | - |
| Omada Health | Wilson, G.; Sweet, C.M.C.; Edge, M.D.; Madero, E.N.; McGuire, M.; Pilsmaker, M.; Carpenter, D.; Kirschner, S.                                                                                                                            | Evaluation of a Digital Behavioral Counseling Program for Reducing Risk Factors for Chronic Disease in a Workforce                                                              | 2017 | 1.591 | Matched control | 1902 | Weight; BMI; Blood glucose; BP; Lipids; Waist circumference; Health behaviours | No, no comparison to other treatment                                                                                    | - |
| Omada Health | Sepah, S.C.; Jiang, L.; Peters, A.L.                                                                                                                                                                                                     | Long-Term Outcomes of a Web-Based Diabetes Prevention Program: 2-Year Results of a Single-Arm Longitudinal Study                                                                | 2015 | 4.945 | NCT             | 254  | Weight; HbA1c                                                                  | No, no comparison to other treatment                                                                                    | - |
| Omada Health | Sweet, C.C.; Chiguluri, V.; Gumpina, R.; Abbott, P.; Madero, E.N.; Payne, M.; Happe, L.; Matanich, R.; Renda, A.; Prewitt, T.                                                                                                            | Outcomes of a Digital Health Program With Human Coaching for Diabetes Risk Reduction in a Medicare Population                                                                   | 2017 | 2.007 | NCT             | 9498 | Weight; HbA1c; Cholesterol; Depression; Well-being                             | No, no comparison to other treatment                                                                                    | - |
| Omada Health | Moin, T.; Damschroder, L.; AuYong, M.; Maciejewski, M.L.; Havens, K.; Ertl, K.; Vasti, E.; Weinreb, J.E.; Steinle, N.; Billington, C.J.; Hughes, M.; Makki, F.; Youles, B.; Holleman, R.G.; Kim, H.M.; Kinsinger, L.S.; Richardson, C.R. | Results From a Trial of an Online Diabetes Prevention Program Intervention                                                                                                      | 2018 | 4.435 | CT              | 268  | Weight                                                                         | Yes, results compared to one in-person diabetes prevention program and to one weight loss program from a separate trial | - |
| Omada Health | Su, W.; Chen, F.; Dall, T.M.; Iacobucci, W.; Perreault, L.                                                                                                                                                                               | Return on Investment for Digital Behavioral Counseling in Patients With Prediabetes and Cardiovascular Disease                                                                  | 2016 | 2.038 | Matched control | 1663 | Weight; Diabetes incidence                                                     | No, no comparison to other treatment                                                                                    | - |

|              |                                                                                                      |                                                                                                                                                          |      |       |                 |      |                                                  |                                      |   |
|--------------|------------------------------------------------------------------------------------------------------|----------------------------------------------------------------------------------------------------------------------------------------------------------|------|-------|-----------------|------|--------------------------------------------------|--------------------------------------|---|
| Omada Health | Sepah, S.C.; Jiang, L.; Peters, A.L.                                                                 | Translating the Diabetes Prevention Program into an Online Social Network: Validation against CDC Standards                                              | 2014 | 2.087 | NCT             | 220  | Weight; HbA1c                                    | No, no comparison to other treatment | - |
| Omada Health | Moin, T.; Ertl, K.; Schneider, J.; Vasti, E.; Makki, F.; Richardson, C.; Havens, K.; Damschroder, L. | Women Veterans' Experience With a Web-Based Diabetes Prevention Program: A Qualitative Study to Inform Future Practice                                   | 2015 | 4.945 | NCT             | 20   | Weight                                           | No, no comparison to other treatment | - |
| Omada Health | Sweet, C.C.; Jasik, C.B.; Diebold, A.; DuPuis, A.; Jenretzke, B.                                     | Cost Savings and Reduced Health Care Utilization Associated with Participation in a Digital Diabetes Prevention Program in an Adult Workforce Population | 2020 | NA    | Matched control | 2027 | Weight                                           | No, no comparison to other treatment | - |
| Omada Health | Wilson-Anumudu, F.; Quan, R.; Sweet, C.C.; Cerrada, C.; Juusola, J.; Turken, M.; Jasik, C.B.         | Early Insights From a Digitally Enhanced Diabetes Self-Management Education and Support Program: Single-Arm Nonrandomized Trial                          | 2021 | 4.532 | NCT             | 195  | HbA1c; Lipids; Diabetes distress; Medication use | No, no comparison to other treatment | - |

Abbreviations: DBCI=Digital behaviour change intervention\*=Primary outcomes (only in RCTs); #=RCT not adequately powered; NA=Not available; BMI=body mass index; BP=Blood pressure; CT=Controlled trial; NCT=Non-controlled trial; RCT=Randomized-controlled trial
